# Supplementary material for: Centimeter-scale Gua3SbBr6 single crystals for white light-emitting diodes enabled by inhibition of multi-site nucleation
Source: Royal Society of Chemistry journal article supplement (doi:10.1039/d4tc03776f), 2024-12-10
Supplement: d4tc03776f1.pdf [file d4tc03776f1.pdf]

## Supporting Information

### Centimeter-Scale $\text{Gua}_3\text{SbBr}_6$ Single Crystals for White Light-Emitting Diodes Enabled by Inhibition of Multi-Site Nucleation

*Yongjiang Dou, Zirui Liu, Quanzhen Huang, Tiantian Shi, Sheng Wang\* and Xuyong Yang\**

Dr. Y. Dou, T. Shi and Prof. Q. Huang

School of Electrical and Information Engineering, Henan University of Engineering,  
001 Xianghe Road, Zhengzhou 451191, China

E-mail: [douyongjiang@126.com](mailto:douyongjiang@126.com)

Dr. Z. Liu, S. Wang and Prof. X. Yang

Key Laboratory of Advanced Display and System Applications of Ministry of  
Education, Shanghai University, 149 Yanchang Road, Shanghai 200072, China

E-mail: [nanocrystal@shu.edu.cn](mailto:nanocrystal@shu.edu.cn), [yangxy@shu.edu.cn](mailto:yangxy@shu.edu.cn)

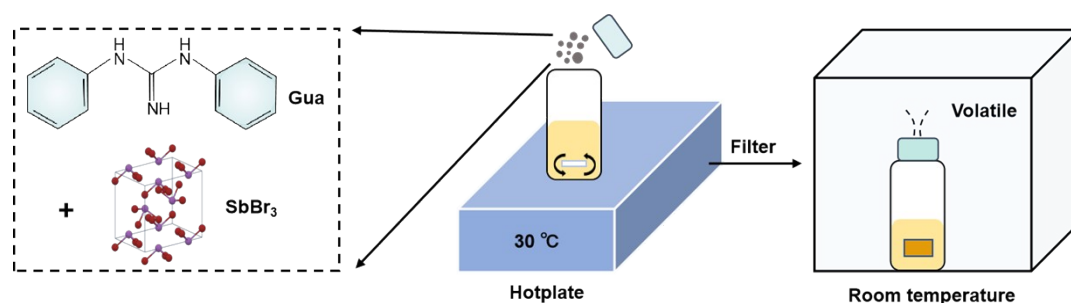

**Figure S1:** Schematic illustration of the solvent evaporation method of  $\text{Gua}_3\text{SbBr}_6$  SC.

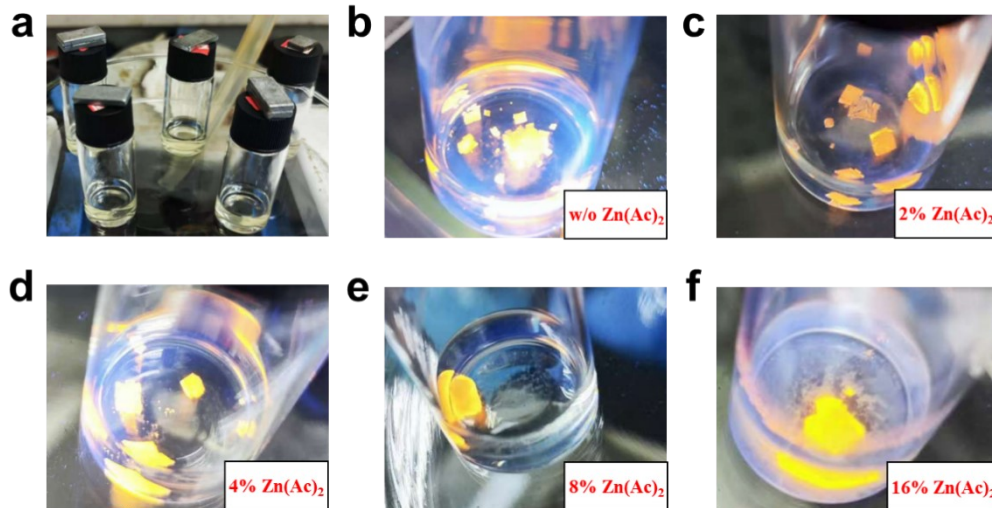

**Figure S2:** Photos of  $\text{Gua}_3\text{SbBr}_6$  SC growth process without  $\text{Zn}(\text{Ac})_2$  and with different percentages of  $\text{Zn}(\text{Ac})_2$  (2%, 4%, 8% and 16%). (a) The initial precursor solution Photos of all samples. Photos of the precursor solution (b) without  $\text{Zn}(\text{Ac})_2$ , (c) 2%  $\text{Zn}(\text{Ac})_2$ , (d) 4%  $\text{Zn}(\text{Ac})_2$ , (e) 8%  $\text{Zn}(\text{Ac})_2$  and (f) (d) 8%  $\text{Zn}(\text{Ac})_2$  under UV light after standing for 24 hours.

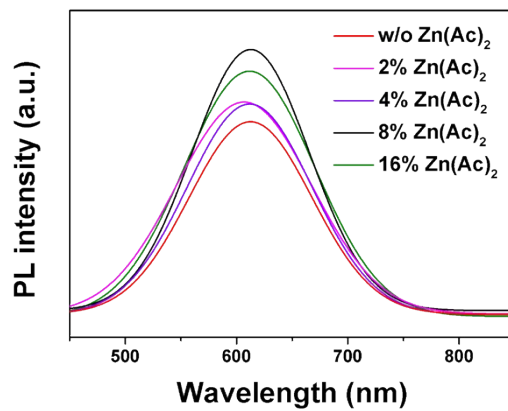

**Figure S3:** PL spectrum of  $\text{Gua}_3\text{SbBr}_6$  SC untreated and treated with 2%, 4%, 8% and 16%  $\text{Zn}(\text{Ac})_2$ .

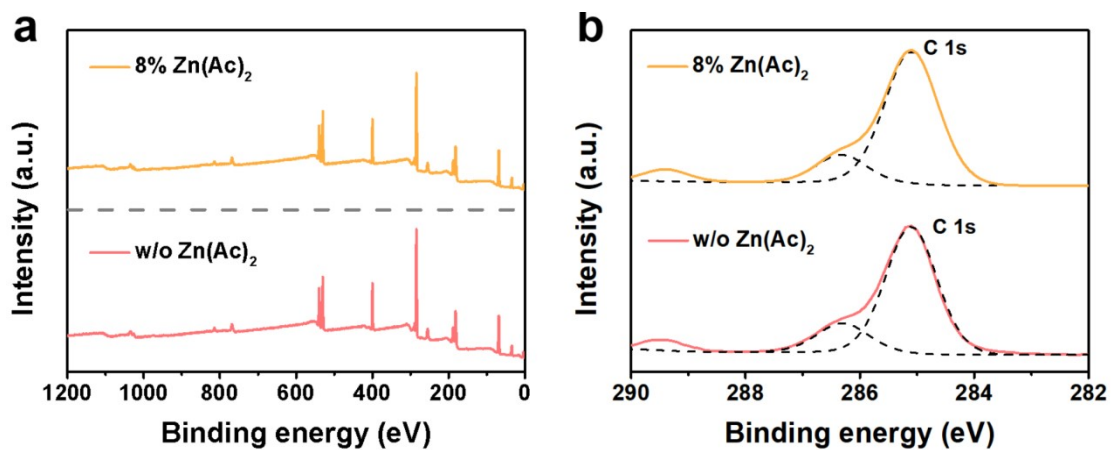

**Figure S4.** XPS spectra of (a) whole XPS spectrum and (b) C 1s of both samples.

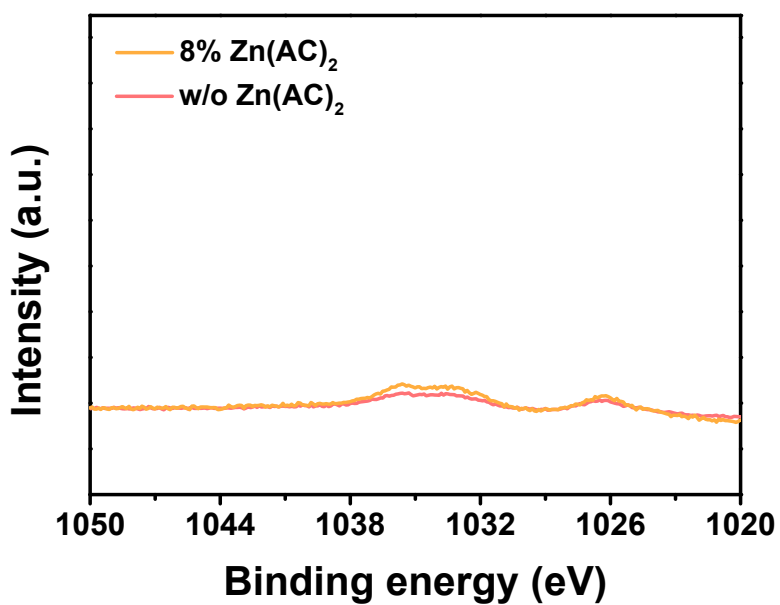

**Figure S5.** The corresponding Zn 2p XPS spectra of Gua<sub>3</sub>SbBr<sub>6</sub> powers without and with 8% Zn(Ac)<sub>2</sub>.

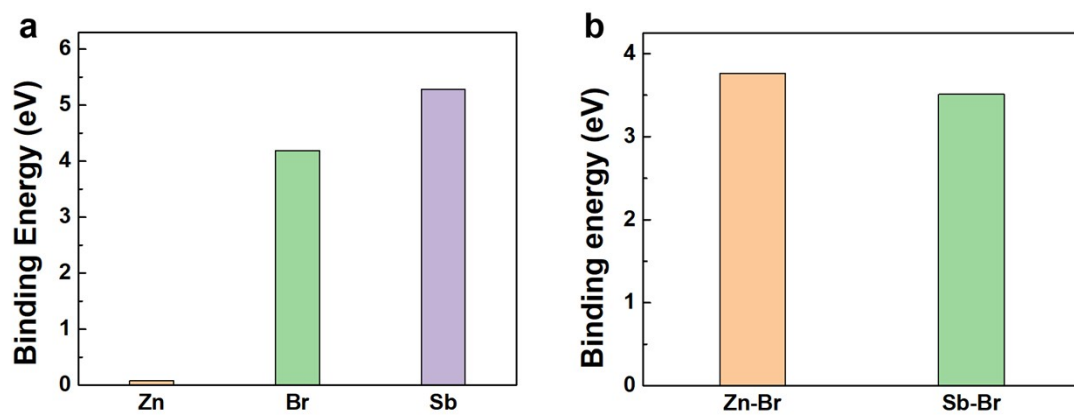

**Figure S6.** (a)The binding energies of DGP with Zn<sup>2+</sup>, Br<sup>-</sup>, Sb<sup>3+</sup>. (b)The binding energies of Zn-Br and Sb-Br.

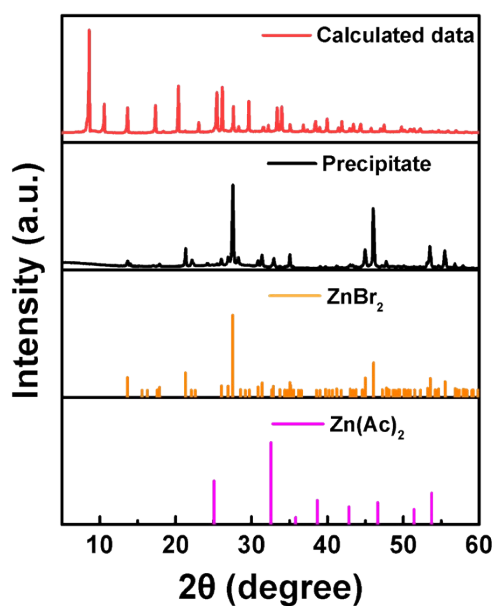

**Figure S7.** Calculated XRD patterns of Gua<sub>3</sub>SbBr<sub>6</sub> SC, measured XRD patterns of precipitate and Standard XRD card of ZnBr<sub>2</sub> and Zn(Ac)<sub>2</sub>.

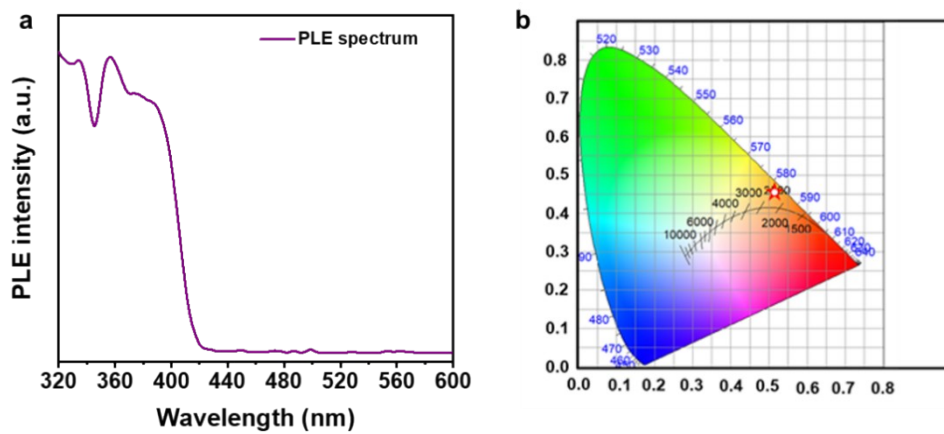

**Figure S8.** (a) The PLE spectrum and (b) CIE coordinate of Gua<sub>3</sub>SbBr<sub>6</sub> SC.

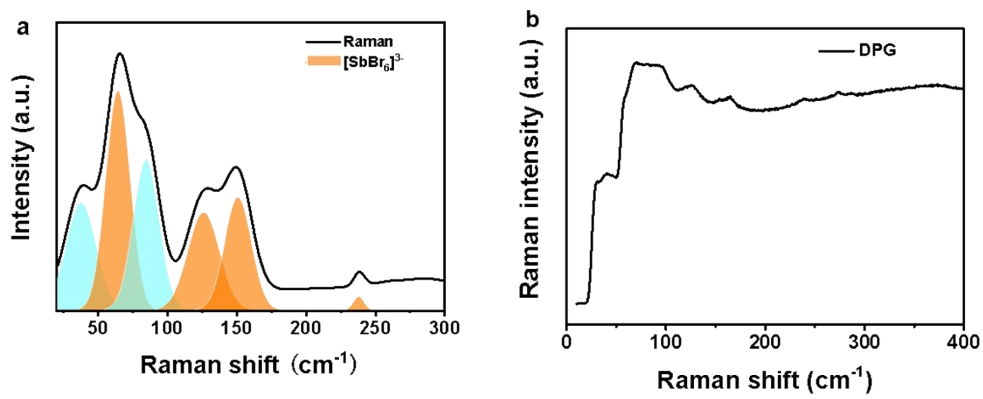

**Figure S9.** Raman spectrum of (a) Gua<sub>3</sub>SbBr<sub>6</sub> and (b) organic Gua powers excited at 633 nm.

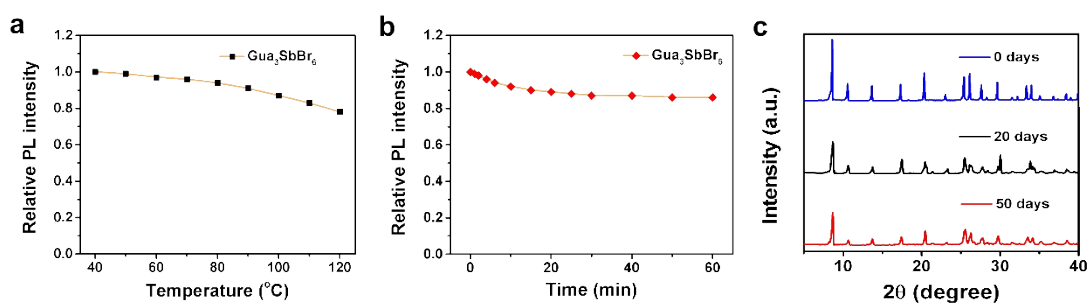

**Figure S10.** Variation of the relative PL intensities of the  $\text{Gua}_3\text{SbBr}_6$  SC with 8%  $\text{Zn}(\text{Ac})_2$  placed (a) in a hotplate, (b) under UV light, and (c) prolonged exposure to the air with 70% humidity.

Table 1: Single-crystal X-ray diffraction data of a  $\text{Gua}_3\text{SbBr}_6$  SC.

|                                     |                                                                                           |
|-------------------------------------|-------------------------------------------------------------------------------------------|
| Empirical formula                   | $(\text{C}_{13}\text{H}_{13}\text{N}_3)_3\text{Sb}_1\text{Br}_6$                          |
| Formula weight                      |                                                                                           |
| Temperature                         | 150 K                                                                                     |
| Wavelength                          | 0.71073                                                                                   |
| Crystal system                      | P-3                                                                                       |
| Space group                         | R3                                                                                        |
| Unit cell dimensions                | $a=16.7199 \alpha=90^\circ$<br>$b=16.7199 \beta=90^\circ$<br>$c=14.1411 \gamma=120^\circ$ |
| volume                              | 1238.02                                                                                   |
| $2\theta$ range for data collection |                                                                                           |
| Reflections collected               | 4669                                                                                      |
| Absorption correction               | MULTI-SCAN                                                                                |
| Max and min transmission            | 0.009 0.028                                                                               |
| Refinement method                   | Full-matrix least-squares on $F^2$                                                        |

Table 2: The performance of the state-of-the-art perovskite-based WLEDs.

| Emitter                                                               | PL peak<br>(nm) | PLQY<br>(%) | Power efficiency<br>(lm/W) | CRI       | Ref                  |
|-----------------------------------------------------------------------|-----------------|-------------|----------------------------|-----------|----------------------|
| (Gua-DPG) <sub>3</sub> SbCl <sub>6</sub>                              | 584             | 100%        | -                          | 86.5      | 1                    |
| Cs <sub>2</sub> NaInCl <sub>6</sub> :Sb <sup>3+</sup>                 | 605             | 92.4%       | -                          | 95.4      | 2                    |
| Cs <sub>2</sub> Cu <sub>2</sub> Cl <sub>5</sub> :Zn <sup>2+</sup>     | 522             | 70.19       | -                          | 95.8      | 3                    |
| Cs <sub>3</sub> InCl <sub>6</sub> :Sb <sup>3+</sup> /Mn <sup>2+</sup> | 620             | 51.38       | -                          | 85.5      | 4                    |
| (OTA) <sub>2+x</sub> SnI <sub>4+x</sub>                               | 617             | 92          | -                          | 92        | 5                    |
| Cs <sub>2</sub> NaInCl <sub>6</sub> :Sb <sup>3+</sup><br>NCs          | 460             | 80.1        | 37.5                       | 80        | 6                    |
| CsPbBr <sub>3</sub> NCs                                               | 517             | 92          | -                          | 86        | 7                    |
| <b>(DPG)<sub>3</sub>SbBr<sub>6</sub></b>                              | <b>611</b>      | <b>100</b>  | <b>48.6</b>                | <b>89</b> | <b>This<br/>work</b> |

## Reference

- (1) Hou, C.; Liu, X.; Wan, C.; Li, B.; Lu, T.; Ge, C.; Song, Y.; Wang, A.; Kang, Y.; Dong, Q. Designing Guanidine-Based Antimony Halides Luminescence Perovskite Crystals toward Near-Unity Quantum Yield. *Chemistry of Materials* **2023**, 35 (24), 10635-10644.
- (2) Li, J.; Sheng, Y.; Tong, G.; Zhu, H.; Tao, X.; Wu, C.; Chang, Y.; Tang, Z.; Yang, J.; Zhang, S.; et al. Anti-Solvent Synthesis of Three-Color Indium-Based Halide

Perovskite Microplate/Microcrystal Phosphors for High Color Rendering WLEDs.

Advanced Optical Materials **2023**, 11 (16), 2300100.

(3) Peng, Y.; Guo, J.; Guo, J.; Wu, J.; Zhang, N.; Zhao, G.; Hou, J.; Zhang, G.; Liu, Y.; Fang, Y. Enhancement of photoluminescence quantum yield in lead-free inorganic copper-based halide perovskites via zinc doping. Journal of Materials Chemistry C **2024**, 12 (33), 12874-12881, 10.1039/D4TC01168F.

(4) Sheng, Y.; Chen, P.; Gao, Y.; He, Y.; Li, J.; Muhammad; Xie, X.; Cheng, C.; Yang, J.; Chang, Y.; et al. Tunable Efficient White Emission of Sb<sup>3+</sup>/Mn<sup>2+</sup> Co-Doped Lead-Free Perovskites for Single-Component White Light-Emitting Diodes. ACS Applied Materials & Interfaces **2024**, 16 (15), 19175-19183.

(5) Li, Z.; Deng, Z.; Johnston, A.; Luo, J.; Chen, H.; Dong, Y.; Sabatini, R.; Sargent, E. H. Precursor Tailoring Enables Alkylammonium Tin Halide Perovskite Phosphors for Solid-State Lighting. Advanced Functional Materials **2022**, 32 (18), 2111346.

(6) Li, X.; Wang, D.; Zhong, Y.; Jiang, F.; Zhao, D.; Sun, S.; Lu, P.; Lu, M.; Wang, Z.; Wu, Z.; et al. Halide Double Perovskite Nanocrystals Doped with Rare-Earth Ions for Multifunctional Applications. Advanced Science **2023**, 10 (20), 2207571.
